# Supplementary material for: Ni, Co and Ni-Co-Modified Tungsten Carbides Obtained by an Electric Arc Method as Dry Reforming Catalysts
Source: MDPI journal article supplement (doi:10.3390/catal12121631), 2022-12-13
Supplement: s1 [file s1]

# Ni, Co and Ni-Co-Modified Tungsten Carbides Obtained by an Electric Arc Method as Dry Reforming Catalysts

Zhanar Bolatova <sup>1</sup>, Dmitrii German <sup>2</sup>, Ekaterina Pakrieva <sup>2</sup>, Alexander Pak <sup>1</sup>, Kirill Larionov <sup>1</sup>,  
Sónia A. C. Carabineiro <sup>3</sup>, Nina Bogdanchikova <sup>4</sup>, Ekaterina Kolobova <sup>2,\*</sup> and Alexey Pestryakov <sup>2,\*</sup>

<sup>1</sup> School of Energy & Power Engineering, National Research Tomsk Polytechnic University, Lenin Av. 30, 634050 Tomsk, Russia

<sup>2</sup> Research School of Chemistry & Applied Biomedical Sciences, National Research Tomsk Polytechnic University, Lenin Av. 30, 634050 Tomsk, Russia

<sup>3</sup> LAQV-REQUIMTE, Department of Chemistry, NOVA School of Science and Technology, Universidade NOVA de Lisboa, 2829-516 Caparica, Portugal

<sup>4</sup> Centro de Nanociencias y Nanotecnología, Universidad Nacional Autónoma de México, Ensenada 22800, Mexico

\* Correspondence: ekaterina\_kolobova@mail.ru (E.K.); pestryakov2005@yandex.ru (A.P.)

## This file contains

### Three figures:

**Citation:** Bolatova, Z.; German, D.; Pakrieva, E.; Pak, A.; Larionov, K.; Carabineiro, S.A.C.; Bogdanchikova, N.; Kolobova, E.; Pestryakov, A. Ni, Co and Ni-Co-Modified Tungsten Carbides Obtained by an Electric Arc Method as Dry Reforming Catalysts. *Catalysts* **2022**, *12*, 1631. <https://doi.org/10.3390/catal12121631>

Academic Editors: Suresh Sagadevan and Volker Hessel

Received: 14 November 2022

Accepted: 7 December 2022

Published: 13 December 2022

**Publisher's Note:** MDPI stays neutral with regard to jurisdictional claims in published maps and institutional affiliations.

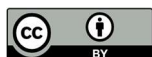

**Copyright:** © 2022 by the authors. Submitted for possible open access publication under the terms and conditions of the Creative Commons Attribution (CC BY) license (<https://creativecommons.org/licenses/by/4.0/>).

**Figure S1.** XRD patterns of support and catalysts: (1) – WC; (2) – 20%Ni/WC\_IWI; (3) – 20%Ni/WC\_DP; (4) – 19%Ni\_1%Co/WC\_IWI; (5) – 19%Ni\_1%Co/WC\_DP; (6) – 15%Ni\_5%Co/WC\_IWI; (7) – 15%Ni\_5%Co/WC\_DP; (8) – 10%Ni\_10%Co/WC\_IWI; (9) – 10%Ni\_10%Co/WC\_DP; (10) – 5%Ni\_15%Co/WC\_IWI; (11) – 5%Ni\_15%Co/WC\_DP; (12) – 1%Ni\_19%Co/WC\_IWI; (13) – 1%Ni\_19%Co/WC\_DP; (14) – 20%Co/WC\_IWI and (15) – 20%Co/WC\_DP.

**Figure S2.** XRD patterns of spent (used) support and catalysts: (16) – WC; (17) – 20%Ni/WC\_IWI; (18) – 20%Ni/WC\_DP; (19) – 10%Ni\_10%Co/WC\_IWI; (20) – 10%Ni\_10%Co/WC\_DP; (21) – 20%Co/WC\_IWI and (22) – 20%Co/WC\_DP.

**Figure S3.** Ni2p and Co2p XPS spectra: (4) – 19%Ni\_1%Co/WC\_IWI; (5) – 19%Ni\_1%Co/WC\_DP; (6) – 15%Ni\_5%Co/WC\_IWI; (7) – 15%Ni\_5%Co/WC\_DP; (10) – 5%Ni\_15%Co/WC\_IWI; (11) – 5%Ni\_15%Co/WC\_DP; (12) – 1%Ni\_19%Co/WC\_IWI and (13) – 1%Ni\_19%Co/WC\_DP.

### One table:

**Table S1.** Catalytic behavior of studied materials in methane dry reforming.

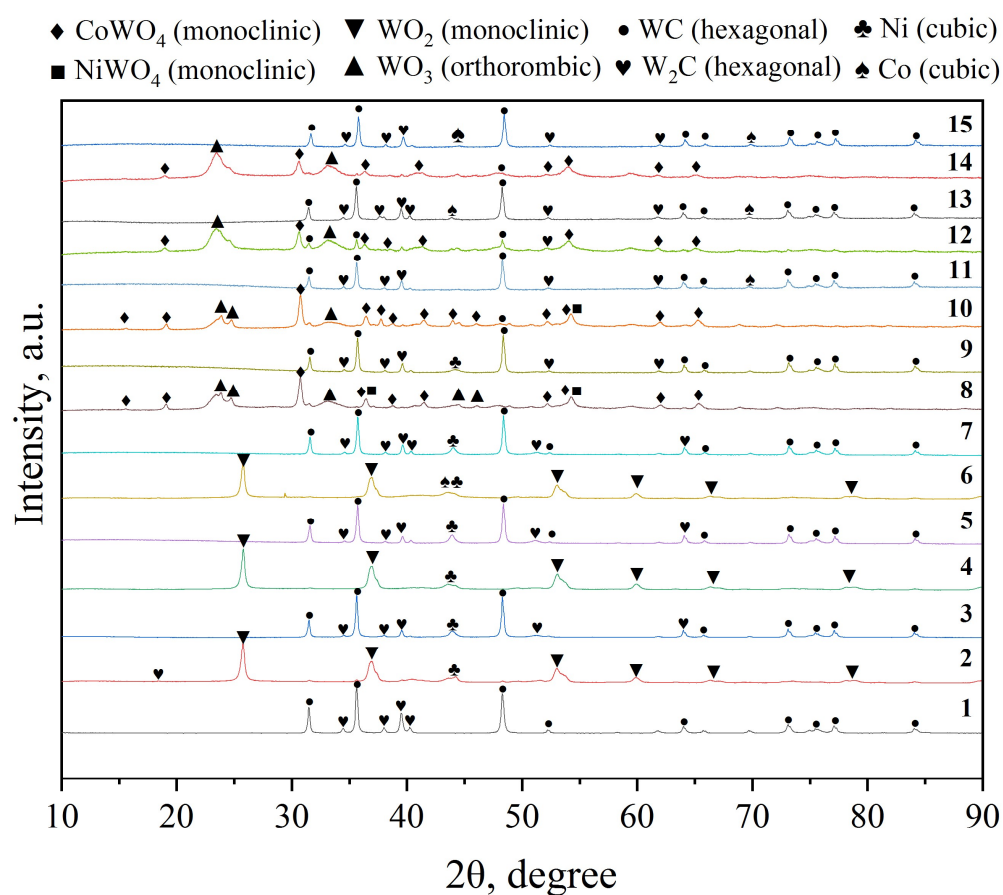

**Figure S1.** XRD patterns of support and catalysts: (1) – WC; (2) – 20%Ni/WC\_IWI; (3) – 20%Ni/WC\_DP; (4) – 19%Ni\_1%Co/WC\_IWI; (5) – 19%Ni\_1%Co/WC\_DP; (6) – 15%Ni\_5%Co/WC\_IWI; (7) – 15%Ni\_5%Co/WC\_DP; (8) – 10%Ni\_10%Co/WC\_IWI; (9) – 10%Ni\_10%Co/WC\_DP; (10) – 5%Ni\_15%Co/WC\_IWI; (11) – 5%Ni\_15%Co/WC\_DP; (12) – 1%Ni\_19%Co/WC\_IWI; (13) – 1%Ni\_19%Co/WC\_DP; (14) – 20%Co/WC\_IWI and (15) – 20%Co/WC\_DP.

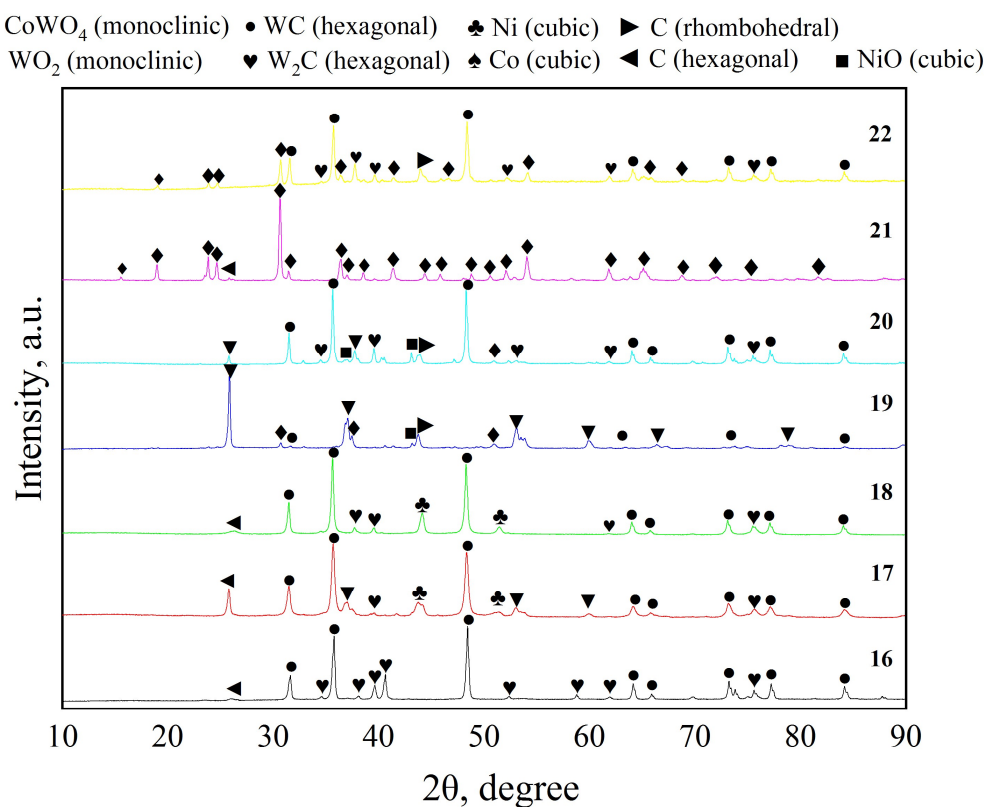

**Figure S2.** XRD patterns of spent (used) support and catalysts: (16) – WC; (17) – 20%Ni/WC\_IWI; (18) – 20%Ni/WC\_DP; (19) – 10%Ni\_10%Co/WC\_IWI; (20) – 10%Ni\_10%Co/WC\_DP; (21) – 20%Co/WC\_IWI and (22) – 20%Co/WC\_DP.

**Ni2p**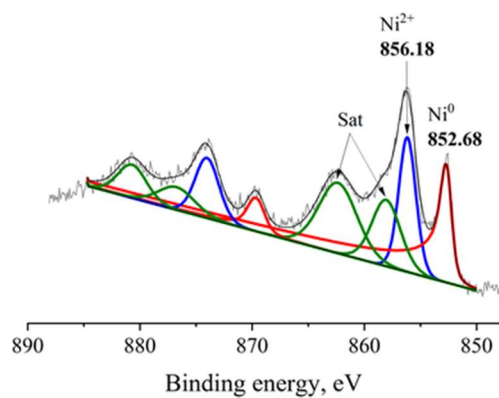**Co2p**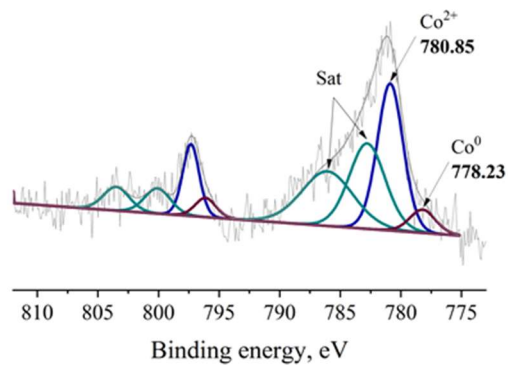**4****Ni2p**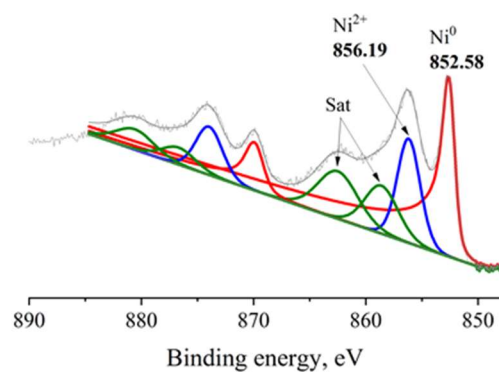**Co2p**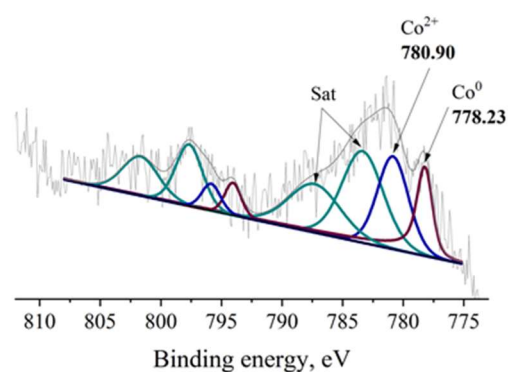**5****Ni2p**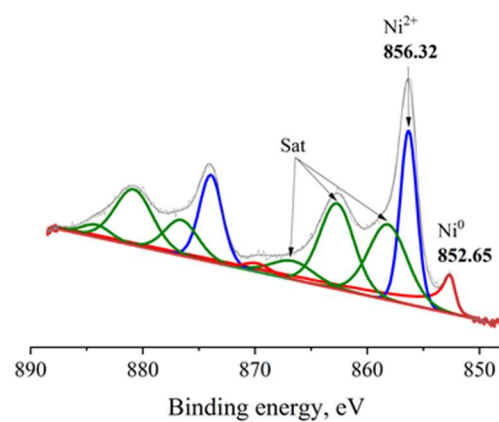**Co2p**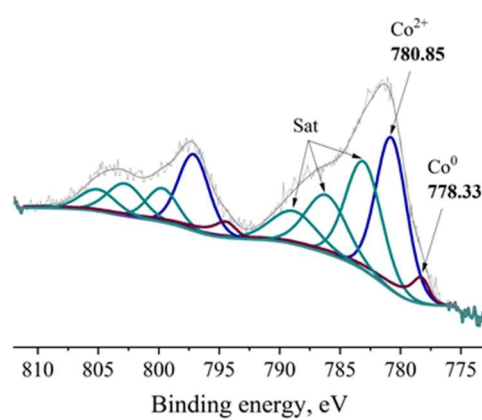**6**

**Ni2p**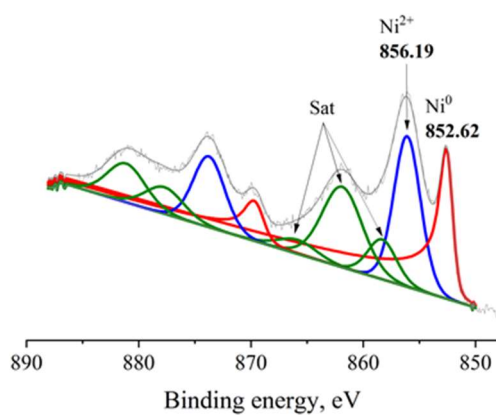**Co2p**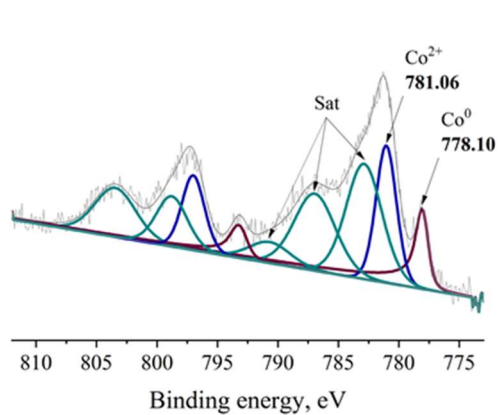**7****Ni2p**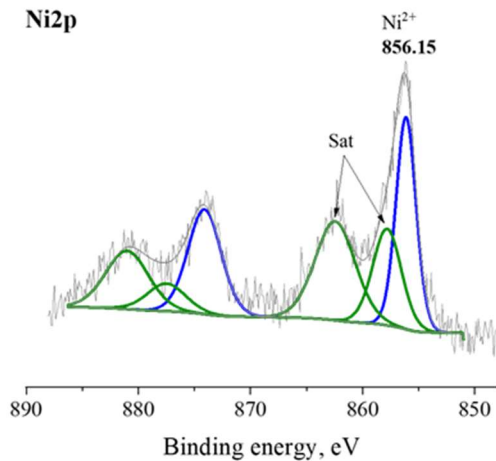**Co2p**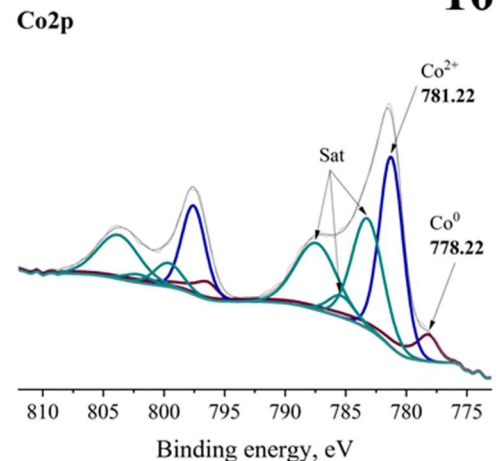**10****Ni2p**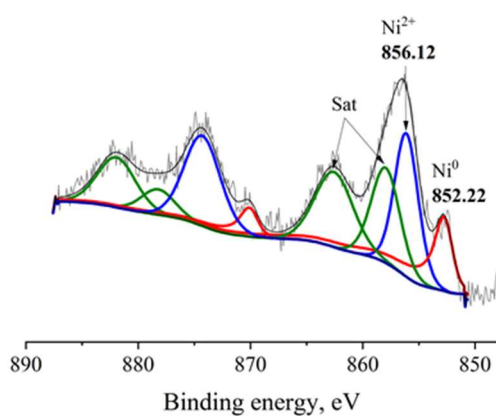**Co2p**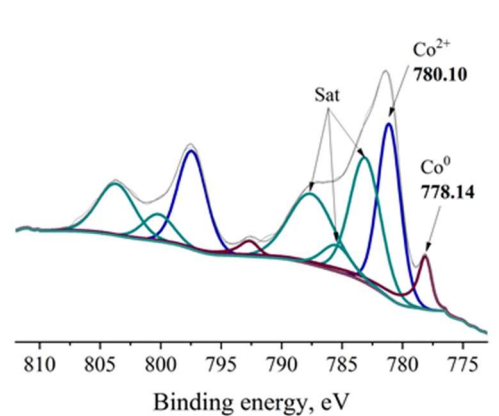**11**

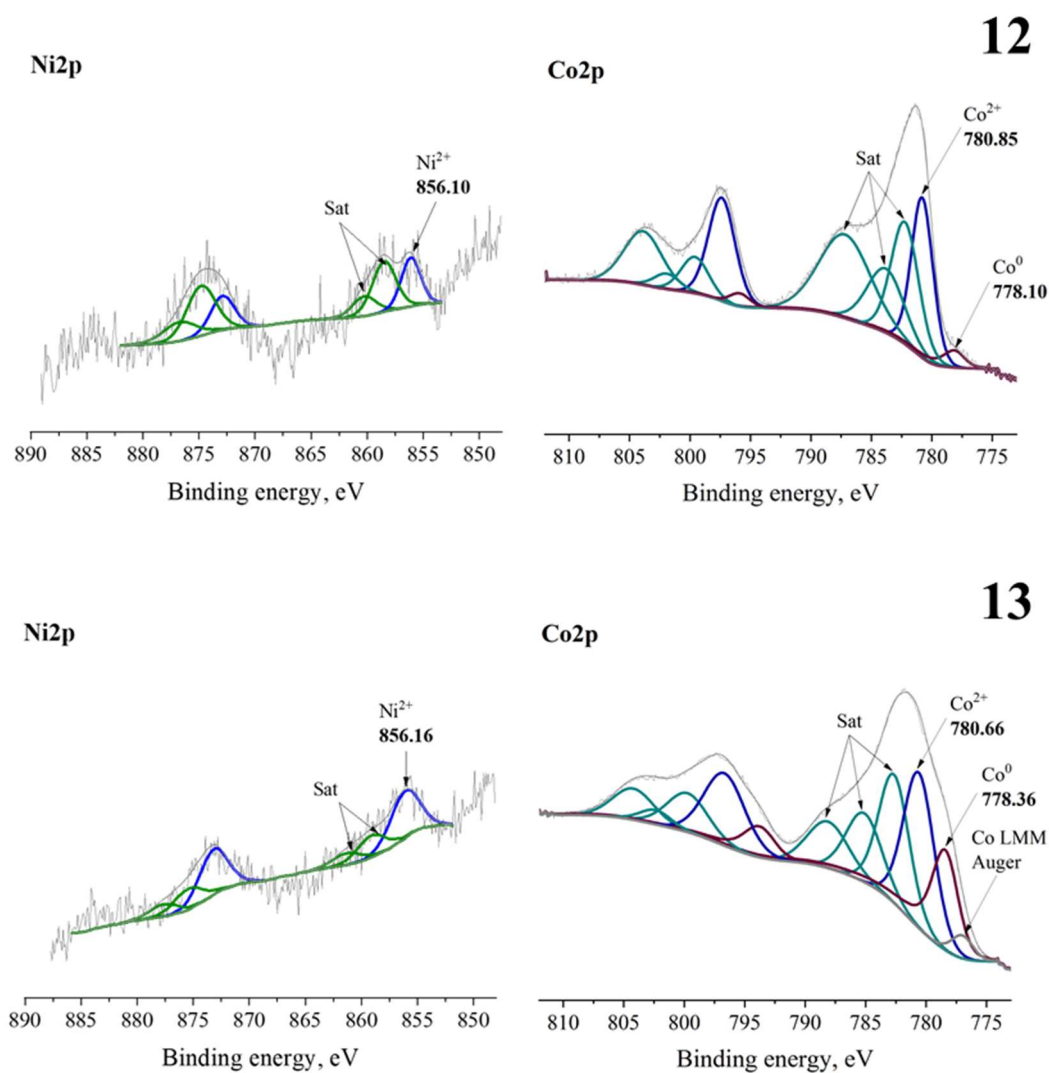

**Figure S3.** Ni2p and Co2p XPS spectra of: (4) - 19%Ni\_1%Co/WC\_IWI; (5) - 19%Ni\_1%Co/WC\_DP; (6) - 15%Ni\_5%Co/WC\_IWI; (7) - 15%Ni\_5%Co/WC\_DP; (10) - 5%Ni\_15%Co/WC\_IWI; (11) - 5%Ni\_15%Co/WC\_DP; (12) - 1%Ni\_19%Co/WC\_IWI and (13) - 1%Ni\_19%Co/WC\_DP.

**Table S1.** Catalytic behavior of the studied materials in methane dry reforming.

| Sample             |                              | Temperature, °C |      |      |      |      |      |      |      |      |
|--------------------|------------------------------|-----------------|------|------|------|------|------|------|------|------|
|                    |                              | 600             |      |      | 700  |      |      | 800  |      |      |
|                    |                              | 1               | 2    | 3    | 1    | 2    | 3    | 1    | 2    | 3    |
| 20%Ni/WC_IWI       | Conv. of CO <sub>2</sub> , % | 34              | 36   | 28   | 52   | 46   | 40   | 64   | 66   | 52   |
|                    | Conv. of CH <sub>4</sub> , % | 38              | 32   | 24   | 52   | 42   | 32   | 64   | 60   | 44   |
|                    | H <sub>2</sub> /CO ratio     | 0.44            | 0.43 | 0.39 | 0.47 | 0.43 | 0.42 | 0.54 | 0.55 | 0.39 |
| 20%Ni/WC_DP        | Conv. of CO <sub>2</sub> , % | 50              | 50   | 40   | 74   | 72   | 58   | 94   | 92   | 88   |
|                    | Conv. of CH <sub>4</sub> , % | 54              | 50   | 40   | 86   | 76   | 54   | 96   | 88   | 80   |
|                    | H <sub>2</sub> /CO ratio     | 0.59            | 0.63 | 0.56 | 0.97 | 0.82 | 0.66 | 1.00 | 0.87 | 0.79 |
| 19%Ni_1%Co/WC_IWI  | Conv. of CO <sub>2</sub> , % | 38              | 32   | 24   | 58   | 48   | 38   | 66   | 64   | 54   |
|                    | Conv. of CH <sub>4</sub> , % | 28              | 26   | 22   | 44   | 36   | 30   | 56   | 54   | 44   |
|                    | H <sub>2</sub> /CO ratio     | 0.45            | 0.42 | 0.46 | 0.48 | 0.43 | 0.41 | 0.56 | 0.50 | 0.41 |
| 19%Ni_1%Co/WC_DP   | Conv. of CO <sub>2</sub> , % | 30              | 26   | 22   | 72   | 76   | 50   | 92   | 88   | 86   |
|                    | Conv. of CH <sub>4</sub> , % | 26              | 24   | 20   | 76   | 74   | 46   | 94   | 86   | 76   |
|                    | H <sub>2</sub> /CO ratio     | 0.35            | 0.33 | 0.33 | 0.79 | 0.80 | 0.47 | 1.00 | 0.83 | 0.75 |
| 15%Ni_5%Co/WC_IWI  | Conv. of CO <sub>2</sub> , % | 34              | 30   | 18   | 50   | 38   | 34   | 60   | 62   | 48   |
|                    | Conv. of CH <sub>4</sub> , % | 28              | 24   | 20   | 44   | 36   | 30   | 54   | 54   | 42   |
|                    | H <sub>2</sub> /CO ratio     | 0.41            | 0.39 | 0.36 | 0.45 | 0.43 | 0.39 | 0.53 | 0.49 | 0.39 |
| 15%Ni_5%Co/WC_DP   | Conv. of CO <sub>2</sub> , % | 32              | 28   | 24   | 62   | 60   | 36   | 88   | 82   | 68   |
|                    | Conv. of CH <sub>4</sub> , % | 30              | 24   | 20   | 58   | 54   | 32   | 92   | 82   | 62   |
|                    | H <sub>2</sub> /CO ratio     | 0.43            | 0.39 | 0.43 | 0.61 | 0.59 | 0.42 | 0.83 | 0.80 | 0.63 |
| 10%Ni_10%Co/WC_IWI | Conv. of CO <sub>2</sub> , % | 30              | 24   | 18   | 36   | 34   | 26   | 56   | 52   | 44   |
|                    | Conv. of CH <sub>4</sub> , % | 26              | 20   | 18   | 32   | 28   | 24   | 52   | 42   | 36   |
|                    | H <sub>2</sub> /CO ratio     | 0.40            | 0.36 | 0.44 | 0.39 | 0.38 | 0.35 | 0.47 | 0.41 | 0.39 |
| 10%Ni_10%Co/WC_DP  | Conv. of CO <sub>2</sub> , % | 32              | 28   | 22   | 40   | 34   | 24   | 46   | 44   | 26   |
|                    | Conv. of CH <sub>4</sub> , % | 26              | 22   | 20   | 30   | 24   | 20   | 36   | 34   | 20   |
|                    | H <sub>2</sub> /CO ratio     | 0.39            | 0.40 | 0.36 | 0.38 | 0.37 | 0.38 | 0.41 | 0.42 | 0.36 |
| 5%Ni_15%Co/WC_IWI  | Conv. of CO <sub>2</sub> , % | 32              | 28   | 20   | 28   | 20   | 14   | 40   | 32   | 28   |
|                    | Conv. of CH <sub>4</sub> , % | 26              | 18   | 18   | 24   | 18   | 14   | 34   | 28   | 24   |
|                    | H <sub>2</sub> /CO ratio     | 0.40            | 0.33 | 0.36 | 0.33 | 0.40 | 0.33 | 0.40 | 0.36 | 0.38 |
| 5%Ni_15%Co/WC_DP   | Conv. of CO <sub>2</sub> , % | 30              | 28   | 22   | 40   | 32   | 24   | 48   | 46   | 24   |
|                    | Conv. of CH <sub>4</sub> , % | 26              | 22   | 20   | 30   | 24   | 20   | 36   | 34   | 20   |
|                    | H <sub>2</sub> /CO ratio     | 0.39            | 0.40 | 0.36 | 0.39 | 0.37 | 0.38 | 0.43 | 0.42 | 0.36 |
| 1%Ni_19%Co/WC_IWI  | Conv. of CO <sub>2</sub> , % | 32              | 22   | 14   | 18   | 2    | 2    | 16   | 12   | 10   |
|                    | Conv. of CH <sub>4</sub> , % | 26              | 18   | 14   | 16   | 2    | 2    | 14   | 12   | 10   |
|                    | H <sub>2</sub> /CO ratio     | 0.33            | 0.36 | 0.29 | 0.20 | 1.00 | 1.00 | 0.39 | 0.33 | 0.5  |
| 1%Ni_19%Co/WC_DP   | Conv. of CO <sub>2</sub> , % | 28              | 32   | 24   | 50   | 46   | 40   | 56   | 54   | 48   |
|                    | Conv. of CH <sub>4</sub> , % | 30              | 26   | 20   | 40   | 36   | 32   | 44   | 40   | 38   |
|                    | H <sub>2</sub> /CO ratio     | 0.44            | 0.37 | 0.33 | 0.40 | 0.39 | 0.40 | 0.39 | 0.39 | 0.37 |

|              |                              |      |      |      |      |      |      |      |      |      |
|--------------|------------------------------|------|------|------|------|------|------|------|------|------|
| 20%Co/WC_IWI | Conv. of CO <sub>2</sub> , % | 32   | 22   | 14   | 20   | 2    | 2    | 14   | 10   | 2    |
|              | Conv. of CH <sub>4</sub> , % | 28   | 16   | 12   | 14   | 2    | 2    | 12   | 10   | 2    |
|              | H <sub>2</sub> /CO ratio     | 0.37 | 0.31 | 0.29 | 0.20 | 1.00 | 1.00 | 0.40 | 0.33 | 1.00 |
| 20%Co/WC_DP  | Conv. of CO <sub>2</sub> , % | 34   | 34   | 24   | 52   | 46   | 38   | 56   | 54   | 46   |
|              | Conv. of CH <sub>4</sub> , % | 28   | 22   | 22   | 38   | 34   | 28   | 42   | 36   | 32   |
|              | H <sub>2</sub> /CO ratio     | 0.42 | 0.37 | 0.29 | 0.40 | 0.36 | 0.33 | 0.39 | 0.39 | 0.35 |

Conv.—Conversion.
